# Supplementary material
Source: PubMed Central journal article supplement (PMC1820914)
Supplement: plntphys_pp.106.093948_4.pdf [file plntphys_pp.106.093948_4.pdf]

**Supplemental Table II: quantitative PCR primers for maize cell cycle genes.**

| Gene           | Forward primer             | Reverse primer            |
|----------------|----------------------------|---------------------------|
| <i>CDC25</i>   | GTCCGGTGCAAGGTGAAGC        | TTGGACGAGATGAATGGTGGTG    |
| <i>CDKA1;1</i> | AGTACCTGGATCTGGACCTCAAG    | GCAACACCGTGGAGTATCTGG     |
| <i>CDKA2;1</i> | GTTGATGTGTGGTCAGTTGGTTG    | GCCATGTTTCTTTAGTTGGAGTGC  |
| <i>CDKB1;1</i> | CCACAACACAACACTCCACTCC     | ACCGTCGATGGGCAAGGG        |
| <i>CDKB2;1</i> | CAAGCAGGGCGTCAACAAGG       | GAACTTCTTCAGGTCCGGTGTCC   |
| <i>CDKC2</i>   | AGCAACAGAGGCAGGCAGAG       | GCAAGCGAGAATGTGGTGGAG     |
| <i>CKDC1</i>   | GTTGCTGCACCTCCACTACG       | GCCTTGGAAGCTGCGATGG       |
| <i>CDKE1</i>   | GCCTTCAACGCTGCCTCAC        | TCCGCTTCCTTCTCAACTGG      |
| <i>CKS1</i>    | GGTGTGATCTGGTTAGTAGCACTG   | AATCACCATGACCATACTGACCATC |
| <i>CKS2</i>    | AAATGTTCCCTGTCTGTCTGTCTGTC | GTGAAATCCCCAAGCCAACCTACC  |
| <i>CYCA1;1</i> | GGCTCGTGGAAGTTGCTGAAG      | CCGTTTGCCTCTGATTTTCGTTG   |
| <i>CYCA1;2</i> | CCAGTATCACGCCATGACAGC      | AGGCAGGAGCACGACTTGG       |
| <i>CYCA3;1</i> | GCCTCCGACATCTACACCTACC     | CACCCGCCGCACCAAATC        |
| <i>CYCA3;2</i> | CGCTTCCCTCCGTCATATGC       | TTGGTGTAGGTGTGTCTGTGATG   |
| <i>CYCA3;3</i> | CCGATAACACCTACACCAAGCAAG   | GTGACGGCAAGAAGCGAAGC      |
| <i>CYCA3;4</i> | TCCTACCGCCAAGACGTTCC       | GAATCAAGCCATAATCCAGCAAGC  |
| <i>CYCB1;1</i> | AGCAGGACGCAGTTGGAGAG       | GAGCCGAGAGCACAGAAGAAAG    |
| <i>CYCB1;2</i> | GATGGACTACGGTATGGTGATGAC   | CAGTGTGGTGTCTCAAGGTCTC    |
| <i>CYCB1;3</i> | CGGGTTCGCTCCACGTTTAC       | CGCCGCCGTTTCATCTGTTC      |
| <i>CYCB2;1</i> | TGAGATGGAGAGGAGGATAGTGAAC  | CTGATTGTGCTGCCTTTAGAAACC  |
| <i>CYCB2;2</i> | CAGTAGTCCAGTCCCTCCTCCTTC   | ATAATAACAAGCAGCAACGGTAACG |
| <i>CYCD1;1</i> | ACTCGCACTCGCACTGACC        | CAAGTGATGAGGGAGGGTAGAGG   |
| <i>CYCD2;1</i> | CAAGTAGGTGGCGTGGCAAG       | CCGAGAATAGCAGCGTTGTCC     |
| <i>CYCD4;1</i> | GGTCTGGTGGAGCGGGAAC        | CTGTGGTGCCTGTAAGCCTTC     |
| <i>CYCD4;2</i> | ATCAGAGCCAGACAGCCAATC      | AGGGTGGAGCCGCCATC         |
| <i>CYCD5;1</i> | CATCGCCGTAGCATCCATCC       | CGGTGTCTAGCTGCGGAAATG     |
| <i>CYCD5;2</i> | GTTCTTGGCTTCTTGCTTCTTGC    | TCTCGTCAGACGTGTCACCAC     |
| <i>CYCH</i>    | CCCGCCCGCTGAATC            | GCCGCCACCTCTCCATC         |
| <i>DEL1</i>    | CCACGAGGAGACCAATATGAGAAC   | GCCCTACCCAACCAACGAAAC     |
| <i>DEL2</i>    | CAGCCGCAAGCAGAAGTCG        | TCGTCCAGCCCAATCACCTC      |
| <i>DPa</i>     | GAAGCGTCGCGGCAATG          | GTAGTCCGTCCCTTTGGTCTCAAC  |
| <i>DPb</i>     | CGCTGAATGTCCCTAATGGCTATGG  | GCTGCTCATTTGCGCCGAACC     |
| <i>DPc</i>     | GTTCACTGGCGTTGTCTGTCTG     | GTTACACCCGTCGTTCTACCAATC  |
| <i>DPd</i>     | CGCTTGTGTCTCCTTCCCTAG      | CGAGGAGAGCGGGAGCTAG       |
| <i>E2F</i>     | ACTACCCCTGGACCTGTAAAAGC    | ATAGCGGCAGTGGTTAATGTGG    |
| <i>KRP1</i>    | AGCAGCAGACGCAGTGGG         | ACGCCTCAGCCTCCTTAGTTG     |
| <i>KRP2</i>    | GGCATGGTCTCCGTTTCTCTTG     | TCTGACAGTGGTCTGGTGGTAG    |
| <i>KRP3</i>    | CACACCCACCTACCTACCTACC     | GGTCCCGTCCGTGCTAAGC       |

|               |                           |                           |
|---------------|---------------------------|---------------------------|
| <i>KRP4</i>   | GTCCCTCAACTCCAATGTAACCC   | CATTAATTCGGCAACTGGTAACAGG |
| <i>RBR1;1</i> | AGGACAGTTTACTTGGTAGTGGAAG | CGTGGAGGAGACATTGGATTTGG   |
| <i>RBR2;1</i> | GGCATCTCCCACAAAGACAATAAAG | CACCTCACGAAGCCACTTAGC     |
| <i>RBR2;2</i> | GGCGAGAAGTCATTGCTGCTAGC   | CCCTTCTCCATTTGCTAGGAACAAG |
| <i>WEE1</i>   | TGGTAATGGTCTTTCACGCTATCG  | TCTTTCACTGCTTGCCTCCTTTC   |

---
